# Supplementary material for: Water-Soluble Melanoidin Pigment as a New Antioxidant Component of Fermented Willowherb Leaves (Epilobium angustifolium)
Source: MDPI journal article supplement (doi:10.3390/antiox10081300), 2021-08-18
Supplement: s1 [file s1]

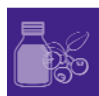

Supplementary Material

# Water-soluble Melanoidin Pigment as a New Antioxidant Component of Fermented Willowherb Leaves (*Epilobium angustifolium*)

Daniil N. Olennikov <sup>1,\*</sup>, Christina S. Kirillina <sup>2</sup> and Nadezhda K. Chirikova <sup>2</sup>

<sup>1</sup> Laboratory of Medical and Biological Research, Institute of General and Experimental Biology, Siberian Division, Russian Academy of Science, 670047 Ulan-Ude, Russia

<sup>2</sup> Department of Biology, Institute of Natural Sciences, North-Eastern Federal University, 677027 Yakutsk, Russia; kristinakirillina22@gmail.com (C.S.K.), hofnung@mail.ru (N.K.C.)

\* Correspondence: olennikovdn@mail.ru; Tel.: +8-902-160-06-27

## Content

**Table S1.** Reference standards used for the qualitative and quantitative analysis by HPLC-MS.

**Table S2.** Regression equations, correlation coefficients ( $r^2$ ), standard deviation ( $S_{yx}$ ), limits of detection (LOD), limits of quantification (LOQ) and linear ranges for 31 reference standards.

**Citation:** Olennikov, D.N.; Kirillina, C.S.; Chirikova, N.K. Water-soluble Melanoidin Pigment as a New Antioxidant Component of Fermented Willowherb Leaves (*Epilobium angustifolium*). *Antioxidants* **2021**, *10*, 1300. <https://doi.org/10.3390/antiox10081300>

Academic Editor: María Pilar Almajano Pablos

Received: 26 July 2021

Accepted: 15 August 2021

Published: 18 August 2021

**Publisher's Note:** MDPI stays neutral with regard to jurisdictional claims in published maps and institutional affiliations.

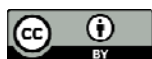

**Copyright:** © 2021 by the authors. Licensee MDPI, Basel, Switzerland. This article is an open access article distributed under the terms and conditions of the Creative Commons Attribution (CC BY) license (<http://creativecommons.org/licenses/by/4.0/>).

**Table S1.** Reference standards used for the qualitative and quantitative analysis by HPLC-MS.

| Compound, formula                                                                                                                               | Purity (≥), % | Manufacturer (cat. No) or isolation reference <sup>a</sup> | Used for analysis of compounds (No in Table 2 or name in Table 5) |
|-------------------------------------------------------------------------------------------------------------------------------------------------|---------------|------------------------------------------------------------|-------------------------------------------------------------------|
| 1-O-Galloyl-β-D-glucopyranose<br>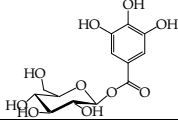                              | 90            | Sigma (69288)                                              | QL: 1, 2. QT: 1, 2                                                |
| Gallic acid<br>                                                | 97            | Sigma (G7384)                                              | QL: 3. QT: 3                                                      |
| Oenothien B<br>                                               | 98            | Biopurity (BP1809)                                         | QL: 7. QT: 7–12                                                   |
| Amritoside = 1-O-ellagoyl-gentiobiose<br>                    | No data       | Lab collection/isolated from <i>Punica granatum</i> [48]   | QL: 14                                                            |
| Granatoside A = 1,6'-di-O-ellagoyl-gentiobiose<br>           | No data       | Lab collection/isolated from <i>Punica granatum</i> [48]   | QL: 16                                                            |
| 1-O-Ellagoyl-β-D-glucopyranoside<br>                         | No data       | Lab collection/isolated from <i>Punica granatum</i> [48]   | QL: 17                                                            |
| Ellagic acid<br>                                             | 95            | Sigma (E2250)                                              | QL: 18. QT: 4–6, 13–19, 20–26                                     |
| Granatoside B =<br>1,6-Di-O-ellagoyl-β-D-glucopyranoside<br> | No data       | Lab collection/isolated from <i>Punica granatum</i> [48]   | QL: 19                                                            |

Table S1. Cont.

| Compound, formula                                                                                                                         | Purity (≥), % | Manufacturer (cat. No) or isolation reference <sup>a</sup> | Used for analysis of compounds (No in Table 2 or name in Table 5) |
|-------------------------------------------------------------------------------------------------------------------------------------------|---------------|------------------------------------------------------------|-------------------------------------------------------------------|
| 1-O-Sinapoyl-β-D-glucopyranoside<br>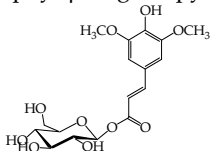                     | No data       | Lab collection/isolated from <i>Panax ginseng</i> [49]     | QL: 27                                                            |
| 6-O-Sinapoyl-β-D-glucopyranoside<br>                     | No data       | Lab collection/isolated from <i>Panax ginseng</i> [49]     | QL: 28                                                            |
| 1-O-Caffeoyl-β-D-glucopyranoside<br>                     | No data       | Lab collection/isolated from <i>Panax ginseng</i> [49]     | QL: 29                                                            |
| 1-O-Caffeoylquinic acid<br>                             | 98            | ChemFaces (CFN99121)                                       | QL: 30. QT: 30                                                    |
| 4-O-Caffeoylquinic acid<br>                            | 98            | Sigma (65969)                                              | QL: 31. QT: 31                                                    |
| 5-O-Caffeoylquinic acid<br>                            | 95            | Sigma (C3878)                                              | QL: 36. QT: 36                                                    |
| Myricetin-3-O-β-D-galactopyranoside<br>                | 85            | Sigma (SMB00249)                                           | QL: 42. QT: 33, 37, 39, 41, 42, 55                                |
| Quercetin-3-O-(6''-galloyl)-β-D-galactopyranoside<br>  | 98            | MCE (HY-N7024)                                             | QL: 43. QT: 34, 35, 38, 40, 43                                    |
| Myricitrin =<br>myricetin-3-O-α-L-rhamnopyranoside<br> | 99            | Sigma (91255)                                              | QL: 44. QT: 44                                                    |
| Rutin = quercetin-3-O-rutinoside<br>                   | 95            | Sigma (R2303)                                              | QL: 45. QT: 45                                                    |

Table S1. Cont.

| Compound, formula                                                                                                                                             | Purity (≥), % | Manufacturer (cat. No) or isolation reference <sup>a</sup>   | Used for analysis of compounds (No in Table 2 or name in Table 5) |
|---------------------------------------------------------------------------------------------------------------------------------------------------------------|---------------|--------------------------------------------------------------|-------------------------------------------------------------------|
| Miquelianin =<br>quercetin-3-O-β-D-glucuronopyranoside<br>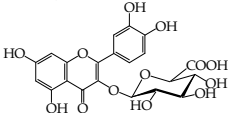                   | 95            | Sigma (00310590)                                             | QL: 46. QT: 46                                                    |
| Hyperoside = quercetin-3-O-β-D-galactopyranoside<br>                         | 98            | Extrasynthese (10275)                                        | QL: 47. QT: 47, 56, 58                                            |
| Avicularin =<br>quercetin-3-O-α-L-arabinofuranoside<br>                      | 95            | Sigma (75759)                                                | QL: 49. QT: 49                                                    |
| Kaempferol-3-O-β-D-glucuronopyranoside<br>                                  | 97            | Sigma (79273)                                                | QL: 50. QT: 48, 50                                                |
| Quercitrin =<br>quercetin-3-O-α-L-rhamnopyranoside<br>                     | 98            | Sigma (740580)                                               | QL: 51. QT: 51                                                    |
| Afzelin =<br>kaempferol-3-O-α-L-rhamnopyranoside<br>                       | 98            | Sigma (PHL83864)                                             | QL: 52. QT: 52                                                    |
| 3-O-Methyl ellagic acid<br>                                                | 90            | Sigma (PHL82590)                                             | QL: 53. QT: 53                                                    |
| Ellagic acid 3,3'-dimethyl ether<br>                                       | 98            | ChemFaces (CFN98217)                                         | QL: 54. QT: 54                                                    |
| Helichrysoside = quercetin-3-O-(6''-O-p-coumaroyl)-β-D-glucopyranoside<br> | No data       | Lab collection/isolated from <i>Spiraea salicifolia</i> [53] | QL: 56                                                            |

Table S1. Cont.

| Compound, formula                                                                                                                                           | Purity (≥), % | Manufacturer (cat. No) or isolation reference <sup>a</sup> | Used for analysis of compounds (No in Table 2 or name in Table 5) |
|-------------------------------------------------------------------------------------------------------------------------------------------------------------|---------------|------------------------------------------------------------|-------------------------------------------------------------------|
| Tiliroside =<br>kaempferol-3-O-(6''-O-p-coumaroyl)-β-D-glucopyranoside<br>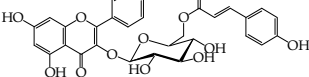 | 98            | Sigma (79257)                                              | QL: 57. QT: 57, 59                                                |
| Sinapic acid<br>                                                           | 98            | Sigma (D7927)                                              | QT: 27, 28                                                        |
| Caffeic acid<br>                                                           | 98            | Sigma (C0625)                                              | QT: 29, 32                                                        |
| 3,5-Dihydroxybenzoic acid<br>                                             | 97            | Sigma (D110000)                                            | QL: 3,5-dihydroxybenzoic acid                                     |
| 3,4-Dihydroxybenzoic acid<br>                                            | 97            | Sigma (37580)                                              | QL: 3,4-dihydroxybenzoic acid                                     |
| 2,6-Dihydroxybenzoic acid<br>                                            | 98            | Sigma (D109606)                                            | QL: 2,6-dihydroxybenzoic acid                                     |
| 4-Hydroxybenzoic acid<br>                                                | 99            | Sigma (240141)                                             | QL: 4-hydroxybenzoic acid                                         |
| 3-Methoxy-4-hydroxybenzoic acid<br>                                      | 97            | Sigma (H36001)                                             | QL: 3-methoxy-4-hydroxybenzoic acid                               |
| 3-Hydroxybenzoic acid<br>                                                | 99            | Sigma (H20008)                                             | QL: 3-hydroxybenzoic acid                                         |
| 4-Methoxybenzoic acid<br>                                                | 99            | Sigma (117390)                                             | QL: 4-methoxybenzoic acid                                         |
| 3,4-Dimethoxybenzoic acid<br>                                            | 99            | Sigma (D131806)                                            | QL: 3,4-dimethoxybenzoic acid                                     |
| Benzoic acid<br>                                                         | 99.5          | Sigma (242381)                                             | QL: benzoic acid                                                  |

Table S1. Cont.

| Compound, formula                                                                                          | Purity (≥), % | Manufacturer (cat. No) or isolation reference <sup>a</sup> | Used for analysis of compounds (No in Table 2 or name in Table 5) |
|------------------------------------------------------------------------------------------------------------|---------------|------------------------------------------------------------|-------------------------------------------------------------------|
| 3-Methoxybenzoic acid<br>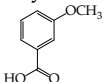 | 99            | Sigma (117714)                                             | QL: 3-methoxybenzoic acid                                         |

<sup>a</sup> Manufacturers list: Biopurity—Biopurity Phytochemicals Ltd (Chengdu, PRC); ChemFaces—ChemFaces (Wuhan, Hubei, PRC); Extrasynthese—Extrasynthese (Lyon, France); MCE—MCE Med Chem Express (Monmouth, NJ, USA); Sigma—Sigma-Aldrich (St. Louis, MO, USA). <sup>b</sup> QL—qualitative analysis; QT—quantitative analysis.

**Table S2.** Regression equations, correlation coefficients ( $r^2$ ), standard deviation ( $S_{yx}$ ), limits of detection (LOD), limits of quantification (LOQ) and linear ranges for 31 reference standards.

| Compound                                                    | Ionization <sup>a</sup> | CE <sup>b</sup><br>(eV) | Regression equation <sup>c</sup> |                | $r^2$  | $S_{yx}$              | LOD/<br>LOQ<br>( $\mu\text{g/mL}$ ) | Linear range<br>( $\mu\text{g/mL}$ ) |
|-------------------------------------------------------------|-------------------------|-------------------------|----------------------------------|----------------|--------|-----------------------|-------------------------------------|--------------------------------------|
|                                                             |                         |                         | $a$                              | $b \cdot 10^6$ |        |                       |                                     |                                      |
| 1-O-Caffeoylquinic acid                                     | N                       | -15                     | 2.5394                           | -1.2360        | 0.9994 | $0.45 \cdot 10^{-2}$  | 0.006/0.02                          | 0.02–300.0                           |
| 1-O-Galloyl- $\beta$ -D-glucopyranose                       | N                       | -20                     | 1.3586                           | -0.0663        | 0.9987 | $9.69 \cdot 10^{-2}$  | 0.24/0.71                           | 0.8–100.0                            |
| 3-O-Caffeoylquinic acid                                     | N                       | -15                     | 2.4176                           | -1.5647        | 0.9994 | $0.40 \cdot 10^{-2}$  | 0.005/0.02                          | 0.02–300.0                           |
| 3-O-Methyl ellagic acid                                     | N                       | -35                     | 0.9361                           | -0.4518        | 0.9870 | $9.35 \cdot 10^{-2}$  | 0.32/1.00                           | 1.0–100.0                            |
| 4-O-Caffeoylquinic acid                                     | N                       | -15                     | 2.7365                           | -1.0690        | 0.9996 | $0.51 \cdot 10^{-2}$  | 0.006/0.02                          | 0.02–300.0                           |
| 5-O-Caffeoylquinic acid                                     | N                       | -15                     | 2.9021                           | -1.4184        | 0.9998 | $0.39 \cdot 10^{-2}$  | 0.004/0.01                          | 0.02–300.0                           |
| Afzelin = kaempferol-3-O- $\alpha$ -L-rhamnopyranoside      | N                       | -20                     | 2.0859                           | -0.9171        | 0.9980 | $6.18 \cdot 10^{-2}$  | 0.03/0.09                           | 0.10–100.0                           |
| Avicularin = quercetin-3-O- $\alpha$ -L-arabinofuranoside   | N                       | -20                     | 1.4412                           | -0.6211        | 0.9930 | $11.25 \cdot 10^{-2}$ | 0.26/0.78                           | 0.80–100.0                           |
| Caffeic acid                                                | N                       | -20                     | 2.4493                           | -0.0938        | 0.9989 | $1.85 \cdot 10^{-2}$  | 0.03/0.08                           | 0.1–100.0                            |
| Ellagic acid                                                | N                       | -30                     | 0.9114                           | -0.6312        | 0.9887 | $6.37 \cdot 10^{-2}$  | 0.23/0.70                           | 0.7–100.0                            |
| Ellagic acid 3,3'-dimethyl ether                            | N                       | -35                     | 0.6370                           | -0.4521        | 0.9872 | $6.11 \cdot 10^{-2}$  | 0.32/0.96                           | 1.0–100.0                            |
| Gallic acid                                                 | N                       | -10                     | 2.6538                           | -0.1376        | 0.9990 | $1.17 \cdot 10^{-2}$  | 0.01/0.04                           | 0.10–100.0                           |
| Hyperoside = quercetin-3-O- $\beta$ -D-galactopyranoside    | N                       | -20                     | 1.4689                           | -0.3641        | 0.9990 | $5.69 \cdot 10^{-2}$  | 0.12/0.38                           | 0.40–400.0                           |
| Isomyricitrin = myricetin 3-O- $\beta$ -D-glucopyranoside   | N                       | -20                     | 2.6340                           | -0.2411        | 0.9973 | $2.74 \cdot 10^{-2}$  | 0.03/0.10                           | 0.10–350.0                           |
| Isoquercitrin = quercetin 3-O- $\beta$ -D-glucopyranoside   | N                       | -20                     | 1.8267                           | -0.4160        | 0.9990 | $11.73 \cdot 10^{-2}$ | 0.21/0.67                           | 0.70–400.0                           |
| Juglanin = kaempferol 3-O- $\alpha$ -L-arabinopyranoside    | N                       | -20                     | 2.0384                           | -0.3640        | 0.9975 | $2.02 \cdot 10^{-2}$  | 0.03/0.10                           | 0.10–350.0                           |
| Kaempferol                                                  | N                       | -10                     | 1.2416                           | -0.3615        | 0.9901 | $3.02 \cdot 10^{-2}$  | 0.08/0.24                           | 0.3–100.0                            |
| Kaempferol-3-O- $\beta$ -D-glucuronopyranoside              | N                       | -30                     | 2.2126                           | -0.5160        | 0.9987 | $8.11 \cdot 10^{-2}$  | 0.12/0.37                           | 0.4–100.0                            |
| Miquelianin = quercetin-3-O- $\beta$ -D-glucuronopyranoside | N                       | -20                     | 1.6705                           | -0.4374        | 0.9988 | $12.79 \cdot 10^{-2}$ | 0.25/0.77                           | 0.8–100.0                            |
| Myricetin                                                   | N                       | -15                     | 0.9375                           | -0.7631        | 0.9982 | $1.42 \cdot 10^{-2}$  | 0.05/0.15                           | 0.20–350.0                           |
| Myricetin-3-O- $\beta$ -D-galactopyranoside                 | N                       | -20                     | 2.4751                           | -0.2081        | 0.9976 | $2.04 \cdot 10^{-2}$  | 0.03/0.10                           | 0.10–350.0                           |
| Myricetin 3-O-rutinoside                                    | N                       | -25                     | 1.9634                           | -0.7458        | 0.9963 | $2.59 \cdot 10^{-2}$  | 0.04/0.14                           | 0.20–350.0                           |
| Myricitrin = myricetin-3-O- $\alpha$ -L-rhamnopyranoside    | N                       | -20                     | 1.8233                           | -0.7962        | 0.9975 | $2.02 \cdot 10^{-2}$  | 0.04/0.11                           | 0.20–350.0                           |
| Oenothien B                                                 | N                       | -35                     | 0.8214                           | -0.2716        | 0.9893 | $5.37 \cdot 10^{-2}$  | 0.22/0.65                           | 0.7–100.0                            |
| Protocatechuic acid                                         | N                       | -10                     | 1.9610                           | -0.5271        | 0.9993 | $0.94 \cdot 10^{-2}$  | 0.02/0.05                           | 0.05–250.0                           |
| Quercetin                                                   | N                       | -15                     | 1.1105                           | -0.3211        | 0.9937 | $4.18 \cdot 10^{-2}$  | 0.12/0.38                           | 0.40–400.0                           |
| Quercetin-3-O-(6''-galloyl)- $\beta$ -D-galactopyranoside   | N                       | -25                     | 1.1492                           | -0.6010        | 0.9980 | $4.68 \cdot 10^{-2}$  | 0.14/0.41                           | 0.50–400.0                           |
| Quercitrin = quercetin-3-O- $\alpha$ -L-rhamnopyranoside    | N                       | -20                     | 1.9871                           | -0.6871        | 0.9984 | $5.63 \cdot 10^{-2}$  | 0.09/0.28                           | 0.40–400.0                           |
| Rutin = quercetin-3-O-rutinoside                            | N                       | -20                     | 1.2716                           | -0.7389        | 0.9897 | $9.14 \cdot 10^{-2}$  | 0.23/0.72                           | 0.80–400.0                           |
| Sinapic acid                                                | N                       | -20                     | 1.4238                           | -0.0891        | 0.9901 | $7.33 \cdot 10^{-2}$  | 0.17/0.52                           | 0.6–100.0                            |

Table S2. Cont.

| Compound                                                                                                  | Ionization <sup>a</sup> | CE <sup>b</sup><br>(eV) | Regression equation <sup>c</sup> |                | $r^2$  | $S_{YX}$               | LOD/<br>LOQ<br>(µg/mL) | Linear<br>range<br>(µg/mL) |
|-----------------------------------------------------------------------------------------------------------|-------------------------|-------------------------|----------------------------------|----------------|--------|------------------------|------------------------|----------------------------|
|                                                                                                           |                         |                         | $a$                              | $b \cdot 10^6$ |        |                        |                        |                            |
| Tiliroside =<br>kaempferol-3- <i>O</i> -(6''- <i>O</i> - <i>p</i> -<br>coumaroyl)-β-D-<br>glucopyranoside | N                       | -30                     | 2.3312                           | -0.4563        | 0.9803 | 14.92·10 <sup>-2</sup> | 0.21/0.64              | 0.7–100.0                  |

<sup>a</sup> Ionization mode : N—negative. <sup>b</sup> CE—collision energy. <sup>c</sup> Regression equation:  $y = a \cdot x + b$ .
